# Supplementary material for: Volumetric Absorptive Microsampling in the Analysis of Endogenous Metabolites
Source: MDPI journal article supplement (doi:10.3390/metabo13101038), 2023-09-26
Supplement: s1 [file s1]

**Table S1.** Analytical validations of the developed methods for determination of creatinine in VAMS

| Analytes | Linearity (R <sup>2</sup> ) | LOQ        | Intra-Day Precision CV(%)                                                                   | Inter-Day Precision (CV%)                                                              | Accuracy (%) bias)                                                                       | Matrix Effects (%)                                                   | Recovery (%)                                                       | Hematocrit effects                                                           | Stability                                                | Additional data | Ref  |
|----------|-----------------------------|------------|---------------------------------------------------------------------------------------------|----------------------------------------------------------------------------------------|------------------------------------------------------------------------------------------|----------------------------------------------------------------------|--------------------------------------------------------------------|------------------------------------------------------------------------------|----------------------------------------------------------|-----------------|------|
| Cr       | 0.9941                      | 5 mg/L     | 3.4% (5 µg/mL)<br>7.5% (7.5 µg/mL)<br>4% (35 µg/mL)<br>4.4% (75 µg/mL)                      | 4.5% (5 µg/mL)<br>5.6% (7.5 µg/mL)<br>3.4% (35 µg/mL)<br>6.9% (75 µg/mL)               | 99.1% (5 µg/mL)<br>102.9% (7.5 µg/mL)<br>98% (35 µg/mL)<br>98.6% (75 µg/mL)              | 3.74% (7.5 µg/mL)<br>1.02 (75 µg/mL)                                 | 77.8% (7.5 µg/mL)<br>87.5% (75 µg/mL)                              | –                                                                            | Stable for 14 days (96.4–99.7% of recovery)              | –               | [21] |
| Cr       | >0.99                       | 0.2 mg/dL  | 8.4% (0.2 mg/dL)<br>5.5% (1mg/dL)<br>3.6% (4mg/dL)<br>2.2% (5mg/dL)                         | 3% (0.2 mg/dL)<br>9.9% (1mg/dL)<br>3.1% (4mg/dL)<br>-1.6% (5mg/dL)                     | 108.2% (1mg/dL)<br>102.3% (4mg/dL)                                                       | -3.4% (1mg/dL)<br>-4.7% (4mg/dL)                                     | 112.8% (1mg/dL)<br>107.4% (4mg/dL)                                 | Max. Bias of -10.3% (HCT 0.55 L.L <sup>-1</sup> and 0.25 L.L <sup>-1</sup> ) | -7.2% over 5 days at 3°C and 14.8% for 30 days at -80°C  | –               | [22] |
| Cr       | 0.998                       | 16 µmol/mL | 1.8% (16 µmol/mL PBS based)<br>2.3% (150 µmol/mL PBS based)<br>1.1% (600 µmol/mL PBS based) | 6.5% (115 µmol/mL)<br>5.6% (184 µmol/mL)<br>7.2% (289 µmol/mL)                         | 98% against External Quality Assurance Standards;<br>94.5% against venous blood analysis | <3%                                                                  | 100% - 115% (mean recovery 108%)                                   | -1.1% to 9.6%; mean 4.3% bias                                                | <10% at 4°C. -20°C. and rt. Stable at 37°C for 24 hours. | –               | [23] |
| Cr       | 0.99                        | 3 mg/L     | 2.5% (6050 µg/L)<br>3.9% (11050 µg/L)<br>2.5% (21050 µg/L)                                  | 7.75% (6050 µg/L)<br>12.36% (11050 µg/L)<br>19.53% (21050 µg/L)                        | 92.4% (6050 µg/L)<br>106.6% (11050 µg/L)<br>100.1% (21050 µg/L)                          | –                                                                    | –                                                                  | No HCT dependencies.                                                         | Stability only performed for DBS samples                 | –               | [24] |
| Cr       | > 0.99                      | 10 nmol/mL | 5.33% (10 nmol/mL)<br>5.21% (30 nmol/mL)<br>5.3% (400 NMOL/mL)<br>2.82% (800 nmol/mL)       | 5.42% (10 nmol/mL)<br>5.64% (30 nmol/mL)<br>4.52% (400 NMOL/mL)<br>3.29% (800 nmol/mL) | -5.45% - 4.9%                                                                            | +0.96% to +1.15% (30 nmol/mL)<br><br>+ 0.98% to +1.08% (800 nmol/mL) | 101.75% (30 nmol/mL)<br>95.09 (400 nmol/mL)<br>96.26 (800 nmol/mL) | -4.65% (30 nmol/mL)<br>+1.75% (800 nmol/mL)                                  | Stable for 1 month under 4 and 23 °C (SD<15%)            | –               | [25] |

Abbreviations: creatinine (Cr), room temperature (rt)
