# Supplementary material for: Volumetric Absorptive Microsampling in the Analysis of Endogenous Metabolites
Source: MDPI journal article supplement (doi:10.3390/metabo13101038), 2023-09-26
Supplement: s1 [file s1]

**Table S4.** Analytical validation of the developed method for determination of phosphatidylethanol in VAMS

| Analytes                | Linearity (R <sup>2</sup> ) | LOQ                                                     | Intra-Day Precision CV(%)                                                                                                                                                        | Inter-Day Precision (CV%)                                                                                                                                                           | Accuracy (% bias)                                                              | Matrix Effects (%)                                                                                                                                 | Recovery (%)                                                                                                                                                                                                                                                                                                                                                                                                                                                                                                | Hematocrit effects   | Stability                                                               | Ref  |
|-------------------------|-----------------------------|---------------------------------------------------------|----------------------------------------------------------------------------------------------------------------------------------------------------------------------------------|-------------------------------------------------------------------------------------------------------------------------------------------------------------------------------------|--------------------------------------------------------------------------------|----------------------------------------------------------------------------------------------------------------------------------------------------|-------------------------------------------------------------------------------------------------------------------------------------------------------------------------------------------------------------------------------------------------------------------------------------------------------------------------------------------------------------------------------------------------------------------------------------------------------------------------------------------------------------|----------------------|-------------------------------------------------------------------------|------|
| PEth (UGent laboratory) | -                           | 1.7 ng/ml (LOD)<br>10 ng/ml (LLOQ)<br>2000 ng/ml (ULOQ) | 7.8% (10 ng/ml)<br>6.2% (30 ng/ml)<br>7.9% (500 ng/ml)<br>5.1% (1500 ng/ml)<br>6.9% (735 ng/ml)<br>7.9% (244 ng/ml)<br>8.2% (465 ng/ml)<br>8.6% (146 ng/ml)<br>9.6% (15.7 ng/ml) | 10.9% (10 ng/ml)<br>4.8% (30 ng/ml)<br>7.8% (500 ng/ml)<br>10.1% (1500 ng/ml)<br>4.8% (735 ng/ml)<br>7.5% (244 ng/ml)<br>7.1% (465 ng/ml)<br>10.8% (146 ng/ml)<br>6.6% (15.7 ng/ml) | 5.2% (10 ng/ml)<br>-4.5% (30 ng/ml)<br>-5.5% (500 ng/ml)<br>-6.5% (1500 ng/ml) | <b>Non-IS</b><br>79.6 % (21% RSD) (low QC)<br>77.8% (16% RSD) (high QC)<br><br><b>IS</b><br>100% (7.9% RSD) (low QC)<br>95.9% (5.2% RSD) (high QC) | <b>Non-IS</b><br>64.2% (12% RSD) (low QC low HCT)<br>47.6% (14% RSD) (low QC normal HCT)<br>43.9 (14% RSD) (low QC high HCT)<br><br>62.5% (14% RSD) (high QC low HCT)<br>64.1% (14% RSD) (high QC normal HCT)<br>61.3% (12% RSD) high QC high HCT<br><br><b>IS</b><br>61.0% (10% RSD) (low QC low HCT)<br>46.6% (9.5% RSD) (low QC normal HCT)<br>42.5% (13% RSD) (low QC high HCT)<br><br>54.5% (15% RSD) (high QC low HCT)<br>54.0% (8.1% RSD) (high QC normal HCT)<br>58.6% (10% RSD) (high QC high HCT) | See recovery column. | One week stability at 4°C, RT, and 45° C.<br>One month stability at RT. | [34] |
| Peth (NICC laboratory)  | -                           | 10 ng/ml (LLOQ)<br>2000 ng/ml (ULOQ)                    | 15.4% (10 ng/ml)<br>6.2% (30 ng/ml)<br>9.8% (500 ng/ml)<br>7.1% (1500 ng/ml)                                                                                                     | 13.3% (10 ng/ml)<br>7% (30 ng/ml)<br>4.6% (500 ng/ml)<br>5% (1500 ng/ml)                                                                                                            | 4.4 (10 ng/ml)<br>-10.3% (30 ng/ml)<br>-8.9% (500 ng/ml)<br>8.5% (1500 ng/ml)  | <b>Non-IS</b><br>119.5% (24% RSD) (low QC)<br>107.8% (14% RSD) (high QC)<br><br><b>IS</b><br>110.7% (5% RSD) (low QC) 108% (6% RSD) (high QC)      | <b>LLE efficiency</b><br><b>Non-IS</b><br>71.1% (12% RSD) (low QC low HCT)<br>70.6% (11% RSD) (low QC normal HCT)<br>79.4% (14% RSD) (low QC high HCT)<br>70.8% (14% RSD) (high QC low HCT)<br>78.1 (12% RSD) (high QC normal HCT)<br>81.1 (6% RSD) (high QC high HCT)                                                                                                                                                                                                                                      | See recovery column. | One week stability at 4°C, RT, and 45° C.<br>One month stability at RT. | [34] |

Abbreviations: phosphatidylethanol (PEth), Ghent University Laboratory of toxicology (UGent); National Institute of Criminalistics and Criminology (NICC), low limit of quantitation (LLOQ), upper limit of quantitation (ULOQ); hematocrit effects (HCT), internal standards (IS), liquid liquid extraction (LLE), relative standard deviation (RSD).
