# Supplementary material for: Volumetric Absorptive Microsampling in the Analysis of Endogenous Metabolites
Source: MDPI journal article supplement (doi:10.3390/metabo13101038), 2023-09-26
Supplement: s1 [file s1]

**Table S7.** Analytical validation of the developed method for tryptophan pathway metabolites determination in VAMS

| Analytes | Linearity Range (ng/mL); (R <sup>2</sup> ) |        | LOQ (ng/mL) | Intra-Day Precision RSD(%)                 | Inter-Day Precision RSD(%)                 | Accuracy (% bias)                      | Matrix Effects (%)                     | Recovery (%)                           | Hematocrit effects | Stability                                                                                                                                                                    | Additional data                                                                                                                                           | Ref  |
|----------|--------------------------------------------|--------|-------------|--------------------------------------------|--------------------------------------------|----------------------------------------|----------------------------------------|----------------------------------------|--------------------|------------------------------------------------------------------------------------------------------------------------------------------------------------------------------|-----------------------------------------------------------------------------------------------------------------------------------------------------------|------|
| TRP      | 25-10,000                                  | 0.9988 | 25          | 4.5% - 7.9%                                | 4.7% - 9.5%                                | 90% - 107%                             | 87% - 96%                              | 86% - 96%                              | –                  | 86% - 95% (VAMS stored in a clamshell, in a bag with desiccant, protected from light at room temperature for 30 days).                                                       | <b>Selectivity</b><br>No interference peaks at target retention time.<br><br><b>Carryover</b><br>No signal in the blank was higher than background noise. | [10] |
| NFK      | 0.3-100                                    | 0.9991 | 0.3         | RSD (low, medium, and high concentrations) | RSD (low, medium, and high concentrations) |                    |                                                                                                                                                                              |                                                                                                                                                           |      |
| KYN      | 5-1000                                     | 0.9989 | 5           |                                            |                                            |                                        |                                        |                                        |                    |                                                                                                                                                                              |                                                                                                                                                           |      |
| ATA      | 0.2-100                                    | 0.9993 | 0.2         |                                            |                                            |                                        |                                        |                                        |                    |                                                                                                                                                                              |                                                                                                                                                           |      |
| KYNA     | 0.2-100                                    | 0.9992 | 0.2         |                                            |                                            |                                        |                                        |                                        |                    |                                                                                                                                                                              |                                                                                                                                                           |      |
| 3-HKYN   | 0.2-100                                    | 0.9993 | 0.2         |                                            |                                            |                                        |                                        |                                        |                    |                                                                                                                                                                              |                                                                                                                                                           |      |
| XA       | 0.2-100                                    | 0.9994 | 0.2         |                                            |                                            |                                        |                                        |                                        |                    |                                                                                                                                                                              |                                                                                                                                                           |      |
| 3-HAA    | 0.2-100                                    | 0.9992 | 0.2         |                                            |                                            |                                        |                                        |                                        |                    |                                                                                                                                                                              |                                                                                                                                                           |      |
| QUIN     | 1-500                                      | 0.9991 | 1           |                                            |                                            |                                        |                                        |                                        |                    |                                                                                                                                                                              |                                                                                                                                                           |      |
| PIC      | 1-500                                      | 0.999  | 1           |                                            |                                            |                                        |                                        |                                        |                    |                                                                                                                                                                              |                                                                                                                                                           |      |
| 2-AMA    | 0.1-50                                     | 0.9995 | 0.1         |                                            |                                            |                                        |                                        |                                        |                    | > 85% (extracted samples stored in the autosampler for 24 hours at room temperature).                                                                                        |                                                                                                                                                           |      |
| 5-HTP    | 0.1-50                                     | 0.9994 | 0.1         |                                            |                                            |                                        |                                        |                                        |                    |                                                                                                                                                                              |                                                                                                                                                           |      |
| 5-HT     | 1-500                                      | 0.9991 | 1           |                                            |                                            |                                        |                                        |                                        |                    |                                                                                                                                                                              |                                                                                                                                                           |      |
| 5-HIAA   | 0.1-50                                     | 0.9996 | 0.1         |                                            |                                            |                                        |                                        |                                        |                    |                                                                                                                                                                              |                                                                                                                                                           |      |
| MEL      | 0.2-100                                    | 0.9994 | 0.2         |                                            |                                            |                                        |                                        |                                        |                    |                                                                                                                                                                              |                                                                                                                                                           |      |
| IND      | 0.1-50                                     | 0.9994 | 0.1         |                                            |                                            |                                        |                                        |                                        |                    |                                                                                                                                                                              |                                                                                                                                                           |      |
| TA       | 0.1-50                                     | 0.9992 | 0.1         |                                            |                                            |                                        |                                        |                                        |                    |                                                                                                                                                                              |                                                                                                                                                           |      |
| IDE      | 0.1-50                                     | 0.9993 | 0.1         |                                            |                                            |                                        |                                        |                                        |                    | > 85% (extracted samples stored on the benchtop and exposed to all lab conditions for 24 hours).                                                                             |                                                                                                                                                           |      |
| IPA      | 1-500                                      | 0.9989 | 1           |                                            |                                            |                                        |                                        |                                        |                    |                                                                                                                                                                              |                                                                                                                                                           |      |
| ILA      | 1-500                                      | 0.9991 | 1           |                                            |                                            |                                        |                                        |                                        |                    |                                                                                                                                                                              |                                                                                                                                                           |      |
| IAA      | 1-500                                      | 0.9991 | 1           |                                            |                                            |                                        |                                        |                                        |                    |                                                                                                                                                                              |                                                                                                                                                           |      |
| SK       | 0.1-50                                     | 0.9994 | 0.1         |                                            |                                            |                                        |                                        |                                        |                    |                                                                                                                                                                              |                                                                                                                                                           |      |
| IALD     | 0.2-100                                    | 0.9992 | 0.2         |                                            |                                            |                                        |                                        |                                        |                    |                                                                                                                                                                              |                                                                                                                                                           |      |
| IA       | 0.2-100                                    | 0.9993 | 0.2         |                                            |                                            |                                        |                                        |                                        |                    | 87% - 91% for acidic compounds; 90% - 94% for other compounds (VAMS stored in a clamshell, in a bag with desiccant, protected from light at room temperature for > 30 days). |                                                                                                                                                           |      |

Abbreviations: L-tryptophan (TRP), N-formylkynurenine (NFK), kynurenine (KYN), kynurenic acid (KYNA), 3-hydroxykynurenine (3-HKYN), anthranilic acid (ATA), kynurenine aminotransferase (KAT), serotonin (5-HT), melatonin (MEL), xanthurenic acid (XA), 3-hydroxyanthranilic acid (3-HAA), quinolinic acid (QUIN), picolinic acid (PIC), 2-aminomuconic acid (2-AMA), 5-hydroxytryptophan (5-HTP), 5-hydroxyindole acetic acid (5-HIAA), melatonin (MEL), indole (IND), tryptamine (TA), 3-indoleethanol (IDE), 3-indolepropionic acid (IPA), indolelactic acid (ILA), 3-indoleacetic acid (IAA), skatole (SK), 3-indolealdehyde (IALD), and indoleacrylic acid (IA), relative standard deviation (RSD).
