# Supplementary material for: Volumetric Absorptive Microsampling in the Analysis of Endogenous Metabolites
Source: MDPI journal article supplement (doi:10.3390/metabo13101038), 2023-09-26
Supplement: s1 [file s1]

**Table S2.** Analytical validation data of the developed methods for the determination of endogenous steroids in VAMs.

| Analytes                                                                                             | Linearity (R <sup>2</sup> ) | LOQ                                             | Intra-Day Precision (CV%)                                                                                                                                                                                                                | Inter-Day Precision (CV%)                                                                                                                                                                                                                             | Accuracy                                                                                                                                                                                                                                       | Matrix Effect (%)                                             | Recovery (%)                                                                                                                                                                                                                                                     | Hematocrit Effects                                            | Stability                                                                                                                                                                                                   | Ref  |
|------------------------------------------------------------------------------------------------------|-----------------------------|-------------------------------------------------|------------------------------------------------------------------------------------------------------------------------------------------------------------------------------------------------------------------------------------------|-------------------------------------------------------------------------------------------------------------------------------------------------------------------------------------------------------------------------------------------------------|------------------------------------------------------------------------------------------------------------------------------------------------------------------------------------------------------------------------------------------------|---------------------------------------------------------------|------------------------------------------------------------------------------------------------------------------------------------------------------------------------------------------------------------------------------------------------------------------|---------------------------------------------------------------|-------------------------------------------------------------------------------------------------------------------------------------------------------------------------------------------------------------|------|
| T                                                                                                    | 0.9995                      | 0.78 ng/mL                                      | 3.6% (2 ng/mL)<br>5.2% (10 ng/mL)<br>10.4% (25 ng/mL )                                                                                                                                                                                   | 8.1% (2 ng/mL)<br>4.5% (10 ng/mL)<br>11.6% (25 ng/mL)                                                                                                                                                                                                 | 1.6% (2 ng/mL)<br>0.9% (10 ng/mL)<br>3.8% (25 ng/mL)                                                                                                                                                                                           | 116%                                                          | 89%                                                                                                                                                                                                                                                              | Not evaluated.                                                | > 80% at RT after two months                                                                                                                                                                                | [27] |
| T; ET; DHT; DHEA                                                                                     | > 0.99                      | T and ET: 1.0 ng/mL;<br>DHEA and DHT: 1.5 ng/mL | T: 7% (LOQ)<br>6.4% (375 ng/ml)<br>5.9% (750 ng/ml)<br><br>ET: 6.8% (LOQ)<br>6.2% (375 ng/ml)<br>5.8 % (750 ng/ml)<br><br>DHT: 7% (LOQ)<br>6.9% (375 ng/ml)<br>6.7% (750 ng/ml)<br><br>DHEA: 7%(LOQ)                                     | T: 6.6% (LOQ)<br>5.9% (375 ng/ml)<br>5.3% (750 ng/ml)<br><br>ET: 6.3% (LOQ)<br>5.8% (375 ng/ml)<br>5.5 % (750 ng/ml)<br><br>DHT: 6.9% (LOQ)<br>6.6% (375 ng/ml)<br>6.3% (750 ng/ml)<br><br>DHEA:6.9% (LOQ),<br>6.4 % (375 ng/ml),<br>6.1% (375 ng/ml) | 89-97%                                                                                                                                                                                                                                         | T: 6.1-8.7 %<br>ET: 4.2-7%<br>DHT: 3.2-5.1%<br>DHEA:6.8-8.8 % | LOQ<br>T: 77.3 ± 3.3<br>ET:79.1± 4.6<br>DHT: 81.6 ± 2.6<br>DHEA: 90.1 ± 3.7<br><br>375 ng/ml<br>T: 78.4 ± 3.8<br>ET:79.1 ± 3.1<br>DHT: 80.4 ± 2.7<br>DHEA: 90.2 ± 3.4<br><br>750 ng/ml<br>T: 80.3 ± 2.4 ET:<br>82.0 ± 2.8<br>DHT: 82.7 ± 1.9<br>DHEA: 92.0 ± 2.7 | HCT effects NA (urine specimen)                               | Stability<br>Results after 1 year, at RT:<br><br>LOQ<br>T: 84% ET: 87<br>DHT: 84<br>DHEA: 83<br><br>375 ng/ml<br>T: 85 ET: 88<br>DHT:86<br>DHEA: 84<br><br>750 ng/ml<br>T: 85 ET: 88<br>DHT: 88<br>DHEA: 86 | [28] |
| Cortisol (in Human);<br>Cortisone (in Human);<br>Corticosterone (in Rat)<br>11-Dehydrocorticosterone | 0.993 - 0.999               | -                                               | Cortisol: 2%<br>Cortisone: 32%<br>Corticosterone: 18%<br>11-Dehydrocorticosterone: 29%                                                                                                                                                   | -                                                                                                                                                                                                                                                     | -                                                                                                                                                                                                                                              | -                                                             | cortisol-d4: >96%<br><br>corticosterone-d8: >80%                                                                                                                                                                                                                 | HCT effect present: HCT-adapted volume factors are mandatory. | -                                                                                                                                                                                                           | [29] |
| T; A4;<br>17-OHP                                                                                     | > 0.999                     | T: 1 nmol/L<br>A4: 1nmol/L<br>17-OHP: 4nmol/L   | T:<br>3.2 % (3.3 nmol/L)<br>3.0 % (12.5 nmol/L)<br>2.2 % (24.1 nmol/L)<br><br>A4:<br>3.8 % (3.0 nmol/L)<br>2.7 % (10.7 nmol/L)<br>2.4 % (19.7 nmol/L)<br><br>17-OHP:<br>6.5 % (4.8 nmol/L)<br>3.1 % (20.8 nmol/L)<br>3.5 % (38.1 nmol/L) | T:<br>5.3 % (3.3 nmol/L)<br>4.5% (12.5 nmol/L)<br>5.7% (24.1 nmol/L)<br><br>A4:<br>7.6% (3.0 nmol/L)<br>7.6 % (10.7 nmol/L)<br>5.8% (19.7 nmol/L)<br><br>17-OHP:<br>7.5% (4.8 nmol/L)<br>4.4% (20.8 nmol/L)<br>7.2% (38.1 nmol/L)                     | T:<br>-0.6 % (3.3 nmol/L)<br>1.3 % (12.5 nmol/L)<br>1.8 % (24.1 nmol/L)<br><br>A4:<br>-5.4 % (3.0 nmol/L)<br>-8.8 % (10.7 nmol/L)<br>-5.7 % (19.7 nmol/L)<br><br>17-OHP:<br>-7.1 % (4.8 nmol/L)<br>6.7 % (20.8 nmol/L)<br>12.5 % (38.1 nmol/L) | "The imprecision (%CV) and bias were determined to be <10%"   | 101 - 104% (T)<br><br>95 - 100% (A4)<br><br>96 - 98% (17-OHP)                                                                                                                                                                                                    | -12.8% - 4.3%                                                 | 14 days at RT,<br>20 days at -20 °C,<br>Storage at 60°C not acceptable<br><br>(Acceptance criteria: ± 15.0%)                                                                                                | [30] |

Abbreviations: Testosterone (T), Androstenedione (A4), 17-hydroxyprogesterone (17-OHP), Epitestosterone (ET), Dihydrotestosterone (DHT), Dehydroepiandrosterone (DHEA)
