# Supplementary material for: Volumetric Absorptive Microsampling in the Analysis of Endogenous Metabolites
Source: MDPI journal article supplement (doi:10.3390/metabo13101038), 2023-09-26
Supplement: s1 [file s1]

**Table S5.** Analytical validation of the developed method for determination of phenylalanine, tyrosine, and homogentisic acid in VAMS.

| Analytes              | Linearity (R <sup>2</sup> )               | LOQ       | Intra-Day Precision (CV%)                                                                                  | Inter-Day Precision (CV%)                                                                               | Accuracy (% bias)                                                                                                                                     | Matrix Effects (%)                                                                                             | Recovery (%)                                               | Hematocrit effects                                                                                                 | Stability                                                                                                                                                                            | Additional data                                                                                                                                                                                                                                                                      | Ref  |
|-----------------------|-------------------------------------------|-----------|------------------------------------------------------------------------------------------------------------|---------------------------------------------------------------------------------------------------------|-------------------------------------------------------------------------------------------------------------------------------------------------------|----------------------------------------------------------------------------------------------------------------|------------------------------------------------------------|--------------------------------------------------------------------------------------------------------------------|--------------------------------------------------------------------------------------------------------------------------------------------------------------------------------------|--------------------------------------------------------------------------------------------------------------------------------------------------------------------------------------------------------------------------------------------------------------------------------------|------|
| Phe and Tyr           | –                                         | –         | Phe:<br>5.6% CV (endogenous, 508, and 811) µmol/L<br><br>Tyr:<br>6.2% CV (endogenous, 349, and 557) µmol/L |                                                                                                         | Phe:<br>0.1% bias (endogenous)<br>-15.8% bias (508 µmol/L)<br>-20.4% bias (811 µmol/L)<br><br>Tyr:<br>-12% to -25% bias (349 – 557) µmol/L            | –                                                                                                              | –                                                          | Phe:<br>-12.8% bias (508 µmol/L; 44.4% and 63.3% HCT)<br><br>Tyr:<br>-17.3% bias (349 µmol/L; 44.4% and 63.3% HCT) | 15 days at rt and 4°C. p>0.01.                                                                                                                                                       | <b>Effect of application of different volumes and contact time after tip is filled</b><br><br>Phe:<br>No effect on concentrations, p > 0.01 (20, 50, and 200 µl; 508 µmol/L; 0, 2, 5, and 10 s)<br><br>Tyr:<br>No effect on concentrations, p > 0.01 (349 µmol/L; 0, 2, 5, and 10 s) | [35] |
| Phe and Phe-surrogate | 30 - 3000 µmol/L, r <sup>2</sup> = 0.9894 | 30 µmol/L | Phe:<br>3.1% - 7.7% CV (75, 450, and 2250) µmol/L<br><br>Phe-surrogate:<br>3.5% - 9.3% CV (75, 450, and    | Phe:<br>4.9% - 6.2% CV (75, 450, and 2250) µmol/L<br><br>Phe-surrogate:<br>6.0% - 8.8% CV (75, 450, and | <b>Intra accuracy</b><br>Phe:<br>-3.9% - 13.0% bias (75, 450, and 2250) µmol/L<br><br>Phe-surrogate:<br>-5.3% - 10.9% bias (75, 450, and 2250) µmol/L | Phe: no impact on accuracy and precision (75, 450, and 2250) µmol/L<br><br>Phe-surrogate: -13.5% to 4.9% bias. | Phe-surrogate:<br>88% to 108.4% (75, 450, and 2250) µmol/L | Phe: -10.7 to 3.1% bias; 2.5% to 9.3% CV (75 and 2250 µmol/L; 0.3, 0.5, and 0.7 HCT)                               | 3.25 hrs. in WB at 37°C and room temperature. 232 days (in the VAMS clamshell) at rt.<br>15 days at 45°C.<br>200 hrs. in extract at rt. 208.75 hrs. for reinjection precision at rt. | <b>Lipemic effect</b><br>Phe-surrogate:<br>0.4% to 3.6% bias; 1.9% to 7.9% CV. (75 and 2250 µmol/L)<br><br><b>Selectivity</b><br>Phe and Phe-surrogate:                                                                                                                              | [36] |

|                                      |   |   |                                                                                                                                                                                                                      |                                                                                                                                                                                                                                          |                                                                                                                                                                       |                                                                                                                                                                                                                                      |   |                                                                                                                                                                                                                       |                                                                                                                                                                                               |                                                                                                                                                                                                                                                                                                                                                                                                                                                                |  |
|--------------------------------------|---|---|----------------------------------------------------------------------------------------------------------------------------------------------------------------------------------------------------------------------|------------------------------------------------------------------------------------------------------------------------------------------------------------------------------------------------------------------------------------------|-----------------------------------------------------------------------------------------------------------------------------------------------------------------------|--------------------------------------------------------------------------------------------------------------------------------------------------------------------------------------------------------------------------------------|---|-----------------------------------------------------------------------------------------------------------------------------------------------------------------------------------------------------------------------|-----------------------------------------------------------------------------------------------------------------------------------------------------------------------------------------------|----------------------------------------------------------------------------------------------------------------------------------------------------------------------------------------------------------------------------------------------------------------------------------------------------------------------------------------------------------------------------------------------------------------------------------------------------------------|--|
|                                      |   |   | 2250)<br>μmol/L                                                                                                                                                                                                      | 2250)<br>μmol/L                                                                                                                                                                                                                          | <b>Inter accuracy</b><br>Phe:<br>0.9% - 11.4%<br>bias (75, 450,<br>and 2250)<br>μmol/L<br><br>Phe-surrogate:<br>-1.3% - 9.9%<br>bias (75, 450,<br>and 2250)<br>μmol/L | 1.2% to<br>12.6% CV<br>(75 and<br>2250)<br>μmol/L                                                                                                                                                                                    |   |                                                                                                                                                                                                                       |                                                                                                                                                                                               | No meaningful<br>effect in<br>quantification.<br><br><b>Method<br/>comparison</b><br>Phe VAMS vs<br>plasma samples<br>Pearson<br>Correlation<br>(Significant<br>correlation. p <<br>2.2*10 e^6, R =<br>0.9756).<br>Passing Bablock<br>(Intercept ~ 0;<br>95% CI<br>contained 0,<br>slope ~ 1, value<br>range < LLOQ<br>(30 μmol/L), %<br>bias < 5%).<br>Bland Altman<br>(Proportional<br>mean difference<br>= -0.04246; 95%<br>CI (-0.05904 to -<br>0.02589)). |  |
| Phe; Tyr;<br>HGA in<br>urine<br>VAMS | — | — | <b>Sampling precision</b><br>3.7% CV (absorb till tip is<br>filled and wait 2<br>additional seconds)<br>4.1% CV (sample for 6 s)<br>4.6% CV (sample for 10 s)<br>1.2% CV (good pipetting)<br>4.6% CV (bad pipetting) | <b>Sampling<br/>accuracy<br/>measured vols<br/>(actual vol = 10<br/>μL); &lt;0.47 SD</b><br>10.3 μL (absorb<br>till tip is filled<br>and wait 2<br>additional<br>seconds)<br>10.4 μL (sample<br>for 6 s)<br>10.6 μL (sample<br>for 10 s) | —                                                                                                                                                                     | Phe (< 9.3 SD):<br>83.1% (5 min<br>agitation)<br>95.4% ( 15 min<br>agitation)<br>99% (5 min no<br>agitation)<br>101.1% (15 min<br>no agitation)<br><br>Tyr (< 7.0 SD)<br>86.9% (5 min<br>agitation)<br>104.3% ( 15 min<br>agitation) | — | Phe:<br>Stable for up to<br>28 days (20°C<br>day light/ no<br>light; 4°C no<br>light, 37°C no<br>light).<br><br>Small increase in<br>overall stability<br>at 37°C for up to<br>28 days (AC vs<br>non-AC).<br><br>Tyr: | <b>Mitra drying<br/>time:</b><br>Constant Mitra<br>tip weight<br>reached after<br>drying for 45<br>mins.<br><br><b>Method<br/>comparison<br/>(urine VAMS<br/>vs liquid urine)</b><br><br>Phe: | [37]                                                                                                                                                                                                                                                                                                                                                                                                                                                           |  |

|  |  |  |  |                                                             |  |                                                                                                                                                                                                                      |  |                                                                                                                                                                                                                                                                                                                                                                                                                                                                                                                                    |                                                                                                                                                                                                                                |  |
|--|--|--|--|-------------------------------------------------------------|--|----------------------------------------------------------------------------------------------------------------------------------------------------------------------------------------------------------------------|--|------------------------------------------------------------------------------------------------------------------------------------------------------------------------------------------------------------------------------------------------------------------------------------------------------------------------------------------------------------------------------------------------------------------------------------------------------------------------------------------------------------------------------------|--------------------------------------------------------------------------------------------------------------------------------------------------------------------------------------------------------------------------------|--|
|  |  |  |  | <p>10.1 µL (good pipetting)<br/>10.2 µL (bad pipetting)</p> |  | <p>106.4% (5 min no agitation)<br/>103.9% (15 min no agitation)</p> <p>HGA (&lt;11.9 SD)<br/>82.2% (5 min agitation)<br/>93.5% (15 min agitation)<br/>98.2% (5 min no agitation)<br/>98.8% (15 min no agitation)</p> |  | <p>Deterioration from 14 to 21 days (20°C light/no light).</p> <p>Stable for 28 days (4°C no light).</p> <p>Rapid deterioration within 24 hours (37 °C no light).</p> <p>No statistical impact on (AC vs non-AC)</p> <p>HGA:<br/>Poor stability (20°C light/no light).</p> <p>Stability in non-acidified dried urine VAMS significantly &gt; than non-acidified liquid urine (4 °C no light).</p> <p>Poor stability (37°C no light).</p> <p>No statistical impact on stability (AC vs non-AC).</p> <p><b>Additional notes:</b></p> | <p>1.014 (slope)<br/>0.279 (intercept)<br/>0.985 (R<sup>2</sup>)</p> <p>Tyr:<br/>0.965 (slope)<br/>1.593 (intercept)<br/>0.97 (R<sup>2</sup>)</p> <p>HGA<br/>0.94 (slope)<br/>62.127 (intercept)<br/>0.983 (R<sup>2</sup>)</p> |  |
|--|--|--|--|-------------------------------------------------------------|--|----------------------------------------------------------------------------------------------------------------------------------------------------------------------------------------------------------------------|--|------------------------------------------------------------------------------------------------------------------------------------------------------------------------------------------------------------------------------------------------------------------------------------------------------------------------------------------------------------------------------------------------------------------------------------------------------------------------------------------------------------------------------------|--------------------------------------------------------------------------------------------------------------------------------------------------------------------------------------------------------------------------------|--|

|  |  |  |  |  |  |  |  |                                                                                                                                                                                                                                                                                             |  |  |
|--|--|--|--|--|--|--|--|---------------------------------------------------------------------------------------------------------------------------------------------------------------------------------------------------------------------------------------------------------------------------------------------|--|--|
|  |  |  |  |  |  |  |  | <p>No effect of AC on Mitra device tip Significant improvement in stability at lower temperatures except for PHE in acidified conditions.</p> <p><b>Increased stability observed at 4°C for approximately 28 days for all analytes (recommended transport and storage temperature).</b></p> |  |  |
|--|--|--|--|--|--|--|--|---------------------------------------------------------------------------------------------------------------------------------------------------------------------------------------------------------------------------------------------------------------------------------------------|--|--|

Abbreviations: Phenylalanine (Phe), 2,3-13C215N-Phenylalanine (Phe-surrogate), whole blood (WB), room temperature (rt), Tyrosine (Tyr), seconds (s), hematocrit effects (HCT), homogentisic acid (HGA), volume (vol), and standard deviation (SD), AC(AC).
